# Supplementary material for: In situstructural kinetics of picosecond laser-induced heating and fragmentation of colloidal gold spheres
Source: Royal Society of Chemistry journal article supplement (doi:10.1039/c9cp05202j), 2020-01-01
Supplement: c9cp05202j1.pdf [file c9cp05202j1.pdf]

**Electronic supplementary information for: *In situ*  
structural kinetics of picosecond laser-induced  
heating and fragmentation of colloidal gold spheres**

Anna Ziefuß,<sup>†</sup> Stefan Reich,<sup>‡</sup> Sven Reichenberger,<sup>†</sup> Matteo Levantino,<sup>¶</sup> and  
Anton Plech<sup>\*,‡</sup>

*Department of Technical Chemistry I and Center for Nanointegration Duisburg-Essen, University  
of Duisburg-Essen, Universitätsstrasse 7, D-45141 Essen, Institute for Photon Science and  
Synchrotron Radiation, KIT Karlsruhe, Germany, and ESRF, BP 220, F-38043 Grenoble*

E-mail: anton.plech@kit.edu

---

\*To whom correspondence should be addressed

<sup>†</sup>UDE

<sup>‡</sup>KIT

<sup>¶</sup>ESRF

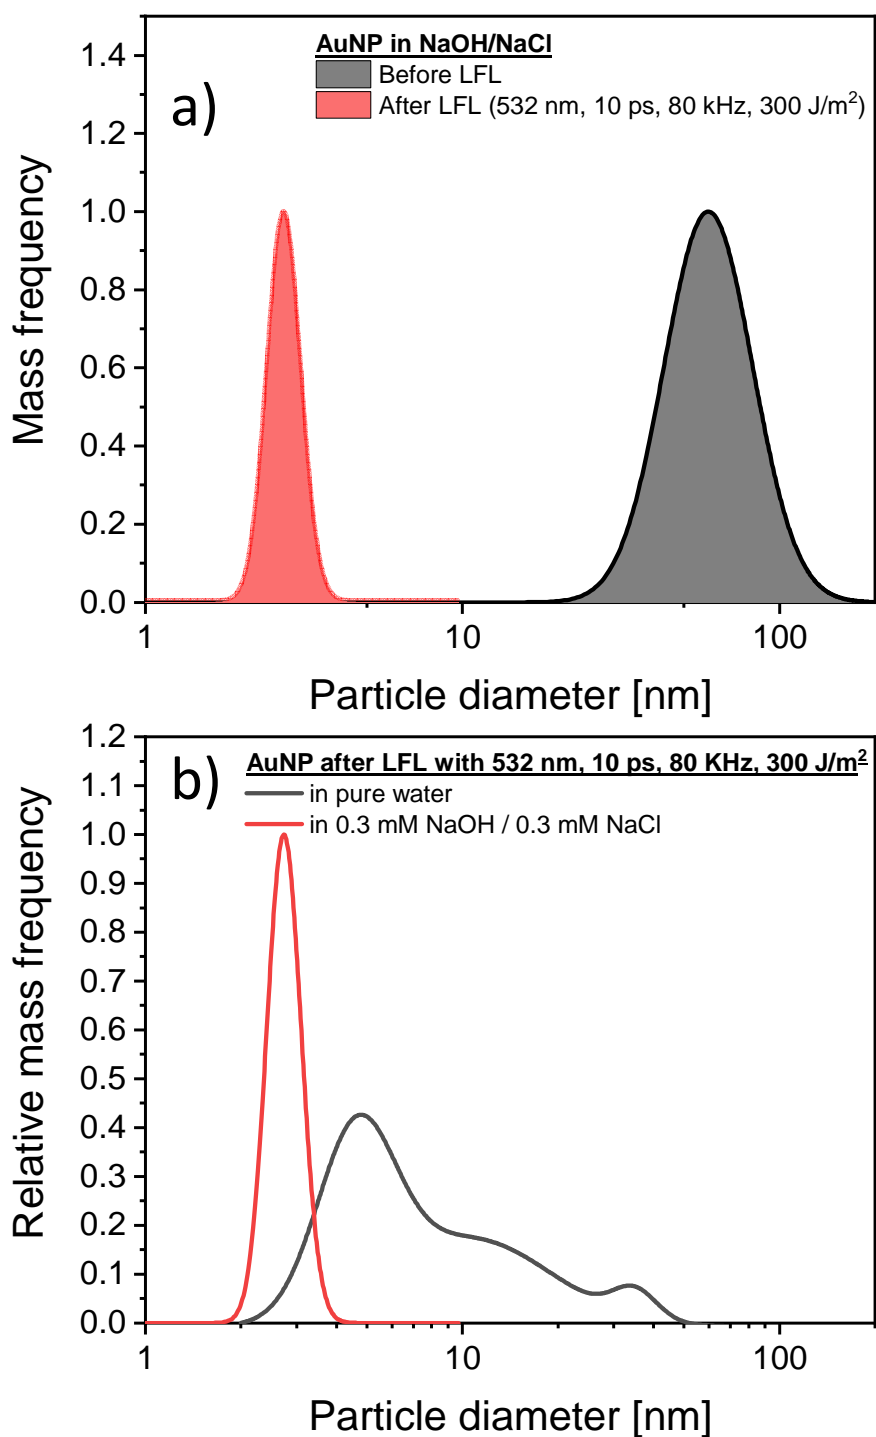

Figure 1: (Supplemental figure 1) a) Mass-weighted particle size distribution of educt and product particles (in 0.3 mM NaOH/NaCl) as derived by analytical ultracentrifugation (ADC). b) Mass-weighted size distribution of product particles in NaOH/NaCl as well as in pure water. The fragmentation has been performed with 10 ps pulses at 532 nm with 80 kHz repetition rate.

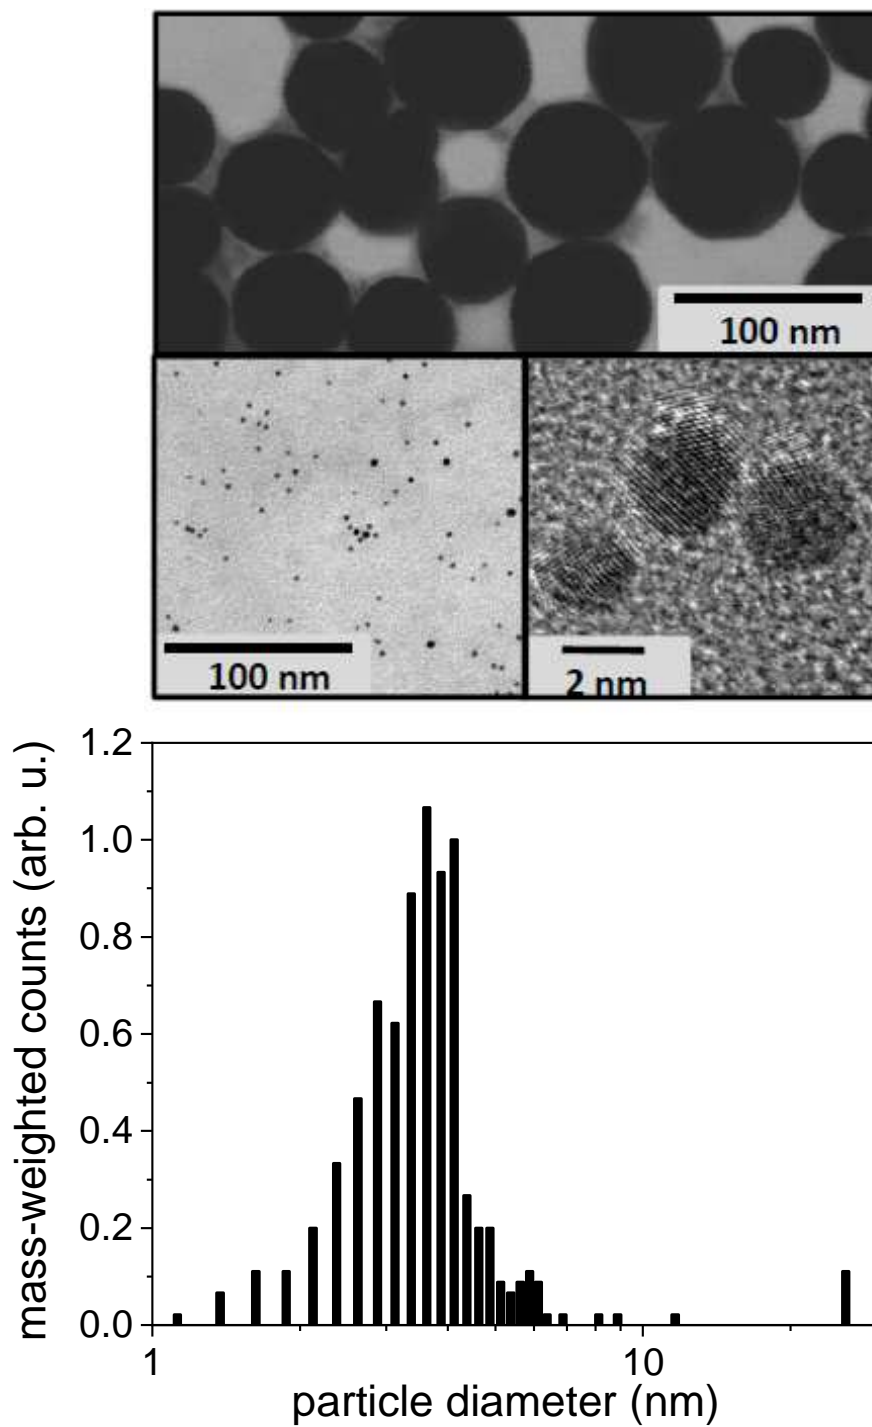

Figure 2: (Supplemental figure 2) TEM images of the educt and product particles as in fig. 1 and S1 together with a size histogram.
